# Supplementary material for: C reactive protein flare predicts response to checkpoint inhibitor treatment in non-small cell lung cancer
Source: PubMed Central journal article supplement — J Immunother Cancer. 2022 Mar 15;10(3):e004024. doi: 10.1136/jitc-2021-004024 (PMC8928397; doi:10.1136/jitc-2021-004024), 2022-03-15

Supplemental figure 1

**A**

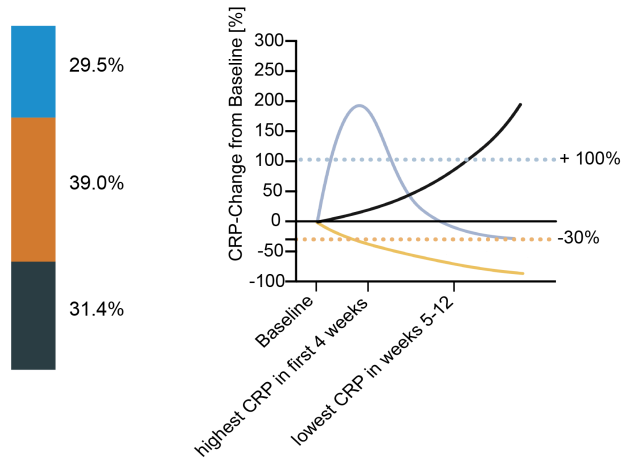

**B**

■ CRP Non-Responder    ■ CRP Responder    ■ CRP Flare-Responder

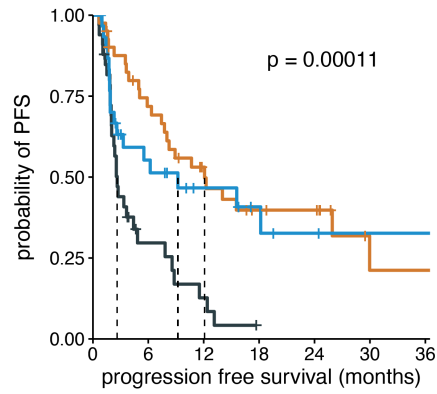

Number at risk

|                     |    |    |    |    |   |   |   |
|---------------------|----|----|----|----|---|---|---|
| CRP Non-Responder   | 33 | 7  | 3  | 0  | 0 | 0 | 0 |
| CRP Responder       | 41 | 27 | 16 | 10 | 9 | 2 | 2 |
| CRP Flare-Responder | 31 | 14 | 8  | 5  | 3 | 2 | 2 |

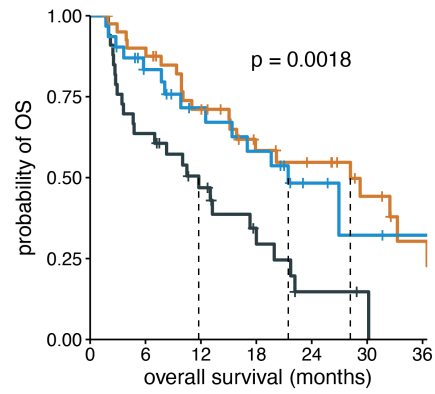

Number at risk

|    |    |    |    |    |   |   |
|----|----|----|----|----|---|---|
| 33 | 21 | 13 | 7  | 2  | 1 | 0 |
| 41 | 36 | 26 | 17 | 14 | 8 | 4 |
| 31 | 22 | 16 | 13 | 7  | 4 | 3 |

Supplemental figure 2

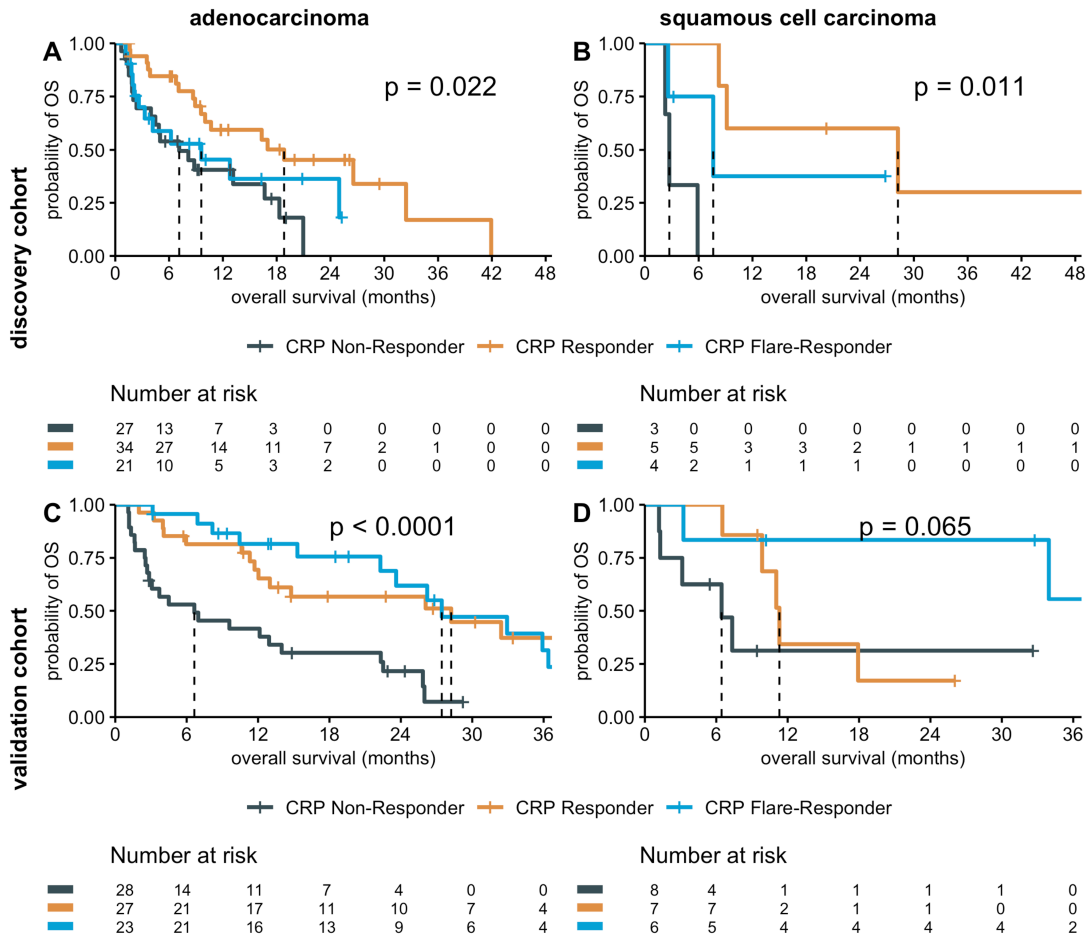

Supplemental figure 3

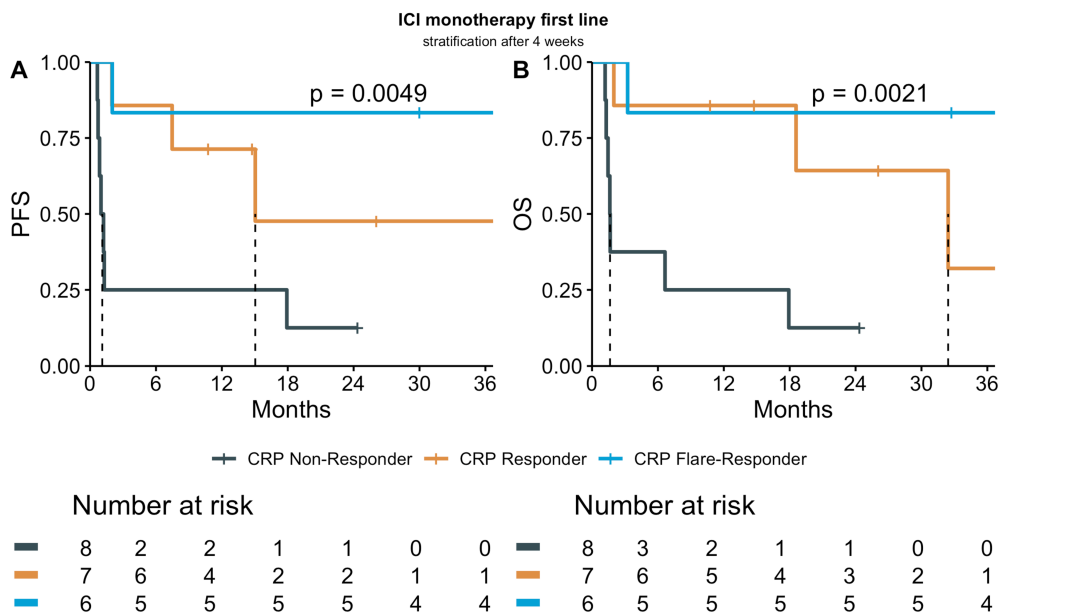

Supplement: jitc-2021-004024supp001.pdf [file jitc-2021-004024supp001.pdf]
