# Supplementary material for: C reactive protein flare predicts response to checkpoint inhibitor treatment in non-small cell lung cancer
Source: PubMed Central journal article supplement — J Immunother Cancer. 2022 Mar 15;10(3):e004024. doi: 10.1136/jitc-2021-004024 (PMC8928397; doi:10.1136/jitc-2021-004024), 2022-03-15
Supplement: jitc-2021-004024supp003.pdf [file jitc-2021-004024supp003.pdf]

Supplemental table 1  
**Baseline characteristics of the discovery cohort**

| Characteristic                         | Overall, N = 105 <sup>1</sup> | Non-Responder, N = 33 | Responder, N = 41 | Flare-Responder, N = 31 | P-value <sup>2</sup> |
|----------------------------------------|-------------------------------|-----------------------|-------------------|-------------------------|----------------------|
| <b>age</b>                             |                               |                       |                   |                         | 0.6                  |
| Median, (IQR)                          | 63, (58, 71)                  | 62, (57, 75)          | 63, (58, 69)      | 66, (60, 71)            |                      |
| Range                                  | 31, 91                        | 43, 84                | 31, 91            | 49, 88                  |                      |
| <b>histology</b>                       |                               |                       |                   |                         | 0.8                  |
| adenocarcinoma                         | 83 (83%)                      | 26 (81%)              | 34 (85%)          | 23 (82%)                |                      |
| SCC                                    | 14 (14%)                      | 4 (12%)               | 5 (12%)           | 5 (18%)                 |                      |
| other                                  | 3 (3.0%)                      | 2 (6.2%)              | 1 (2.5%)          | 0 (0%)                  |                      |
| Unknown                                | 5                             | 1                     | 1                 | 3                       |                      |
| <b>concurrent cytostatic therapy</b>   |                               |                       |                   |                         | 0.13                 |
| no                                     | 50 (48%)                      | 20 (61%)              | 19 (46%)          | 11 (35%)                |                      |
| yes                                    | 55 (52%)                      | 13 (39%)              | 22 (54%)          | 20 (65%)                |                      |
| <b>smoking status</b>                  |                               |                       |                   |                         | 0.14                 |
| current                                | 39 (45%)                      | 7 (29%)               | 17 (50%)          | 15 (54%)                |                      |
| former                                 | 39 (45%)                      | 14 (58%)              | 16 (47%)          | 9 (32%)                 |                      |
| never                                  | 8 (9.3%)                      | 3 (12%)               | 1 (2.9%)          | 4 (14%)                 |                      |
| Unknown                                | 19                            | 9                     | 7                 | 3                       |                      |
| <b>ECOG</b>                            |                               |                       |                   |                         | 0.2                  |
| 0                                      | 0 (0%)                        | 0 (0%)                | 0 (0%)            | 0 (0%)                  |                      |
| 1                                      | 14 (14%)                      | 3 (9.1%)              | 7 (17%)           | 4 (14%)                 |                      |
| 2                                      | 52 (50%)                      | 19 (58%)              | 15 (37%)          | 18 (62%)                |                      |
| >2                                     | 37 (36%)                      | 11 (33%)              | 19 (46%)          | 7 (24%)                 |                      |
| Unknown                                | 2                             | 0                     | 0                 | 2                       |                      |
| <b>sex</b>                             |                               |                       |                   |                         | 0.3                  |
| male                                   | 58 (55%)                      | 15 (45%)              | 26 (63%)          | 17 (55%)                |                      |
| female                                 | 47 (45%)                      | 18 (55%)              | 15 (37%)          | 14 (45%)                |                      |
| <b>line of therapy</b>                 |                               |                       |                   |                         | <b>0.043</b>         |
| first line                             | 70 (67%)                      | 17 (53%)              | 33 (80%)          | 20 (65%)                |                      |
| later lines                            | 34 (33%)                      | 15 (47%)              | 8 (20%)           | 11 (35%)                |                      |
| Unknown                                | 1                             | 1                     | 0                 | 0                       |                      |
| <b>presence of cerebral metastasis</b> |                               |                       |                   |                         | 0.6                  |
| no                                     | 60 (57%)                      | 17 (52%)              | 23 (56%)          | 20 (65%)                |                      |
| yes                                    | 45 (43%)                      | 16 (48%)              | 18 (44%)          | 11 (35%)                |                      |
| <b>concurrent steroid therapy</b>      |                               |                       |                   |                         | 0.3                  |
| no                                     | 80 (76%)                      | 22 (67%)              | 34 (83%)          | 24 (77%)                |                      |
| yes                                    | 25 (24%)                      | 11 (33%)              | 7 (17%)           | 7 (23%)                 |                      |

Supplemental table 1

**Baseline characteristics of the discovery cohort**

| Characteristic        | Overall, N = 105 <sup>1</sup> | Non-Responder, N = 33 | Responder, N = 41 | Flare-Responder, N = 31 | P-value <sup>2</sup> |
|-----------------------|-------------------------------|-----------------------|-------------------|-------------------------|----------------------|
| <b>TPS score</b>      |                               |                       |                   |                         | 0.055                |
| Median, (IQR)         | 10, (0, 60)                   | 10, (0, 56)           | 50, (5, 80)       | 5, (0, 45)              |                      |
| Range                 | 0, 100                        | 0, 100                | 0, 100            | 0, 95                   |                      |
| Unknown               | 13                            | 5                     | 4                 | 4                       |                      |
| <b>TPS score</b>      |                               |                       |                   |                         | 0.2                  |
| TPS ≤ 50%             | 65 (71%)                      | 20 (71%)              | 23 (62%)          | 22 (81%)                |                      |
| TPS > 50%             | 27 (29%)                      | 8 (29%)               | 14 (38%)          | 5 (19%)                 |                      |
| Unknown               | 13                            | 5                     | 4                 | 4                       |                      |
| <b>baseline CRP</b>   |                               |                       |                   |                         | <0.001               |
| Median, (IQR)         | 17, (6, 47)                   | 6, (2, 28)            | 28, (10, 60)      | 13, (6, 31)             |                      |
| Range                 | 0, 305                        | 0, 78                 | 2, 305            | 1, 185                  |                      |
| Unknown               | 3                             | 2                     | 0                 | 1                       |                      |
| <b>baseline CRP</b>   |                               |                       |                   |                         | <0.001               |
| Baseline CRP ≤ 5 mg/L | 21 (21%)                      | 14 (45%)              | 1 (2.4%)          | 6 (20%)                 |                      |
| Baseline CRP > 5 mg/L | 81 (79%)                      | 17 (55%)              | 40 (98%)          | 24 (80%)                |                      |
| Unknown               | 3                             | 2                     | 0                 | 1                       |                      |

<sup>1</sup> c("Median, (IQR)", "Range"); n (%)

<sup>2</sup> Kruskal-Wallis rank sum test; Fisher's exact test; Pearson's Chi-squared test
