# Supplementary material for: C reactive protein flare predicts response to checkpoint inhibitor treatment in non-small cell lung cancer
Source: PubMed Central journal article supplement — J Immunother Cancer. 2022 Mar 15;10(3):e004024. doi: 10.1136/jitc-2021-004024 (PMC8928397; doi:10.1136/jitc-2021-004024), 2022-03-15
Supplement: jitc-2021-004024supp004.pdf [file jitc-2021-004024supp004.pdf]

Supplemental table 2  
Cox regression in the discovery cohort

| Characteristic                         | PFS |                 |                     |                  | OS  |                 |                     |              |
|----------------------------------------|-----|-----------------|---------------------|------------------|-----|-----------------|---------------------|--------------|
|                                        | N   | HR <sup>1</sup> | 95% CI <sup>1</sup> | p-value          | N   | HR <sup>1</sup> | 95% CI <sup>1</sup> | p-value      |
| <b>CRP kinetics</b>                    | 103 |                 |                     |                  | 105 |                 |                     |              |
| Non-Responder                          |     | —               | —                   |                  |     | —               | —                   |              |
| Responder                              |     | 0.33            | 0.19, 0.58          | <b>&lt;0.001</b> |     | 0.37            | 0.20, 0.68          | <b>0.001</b> |
| Flare-Responder                        |     | 0.44            | 0.24, 0.81          | <b>0.008</b>     |     | 0.44            | 0.23, 0.83          | <b>0.012</b> |
| <b>PD-L1 expression</b>                | 90  |                 |                     |                  | 92  |                 |                     |              |
| TPS ≤ 50%                              |     | —               | —                   |                  |     | —               | —                   |              |
| TPS > 50%                              |     | 1.51            | 0.88, 2.61          | 0.13             |     | 1.27            | 0.71, 2.27          | 0.4          |
| <b>baseline CRP</b>                    | 100 |                 |                     |                  | 102 |                 |                     |              |
| Baseline CRP ≤ 5 mg/dl                 |     | —               | —                   |                  |     | —               | —                   |              |
| Baseline CRP > 5 mg/dl                 |     | 0.95            | 0.53, 1.69          | 0.9              |     | 1.12            | 0.59, 2.11          | 0.7          |
| <b>presence of cerebral metastasis</b> | 103 |                 |                     |                  | 105 |                 |                     |              |
| no                                     |     | —               | —                   |                  |     | —               | —                   |              |
| yes                                    |     | 0.91            | 0.57, 1.47          | 0.7              |     | 0.85            | 0.51, 1.41          | 0.5          |

<sup>1</sup> HR = Hazard Ratio, CI = Confidence Interval
