# Supplementary material for: C reactive protein flare predicts response to checkpoint inhibitor treatment in non-small cell lung cancer
Source: PubMed Central journal article supplement — J Immunother Cancer. 2022 Mar 15;10(3):e004024. doi: 10.1136/jitc-2021-004024 (PMC8928397; doi:10.1136/jitc-2021-004024), 2022-03-15
Supplement: jitc-2021-004024supp005.pdf [file jitc-2021-004024supp005.pdf]

Supplemental table 3  
Cox regression in subgroups  
validation cohort

| Characteristic                          | PFS |                 |                     |                  | OS |                 |                     |                  |
|-----------------------------------------|-----|-----------------|---------------------|------------------|----|-----------------|---------------------|------------------|
|                                         | N   | HR <sup>1</sup> | 95% CI <sup>1</sup> | p-value          | N  | HR <sup>1</sup> | 95% CI <sup>1</sup> | p-value          |
| <b>concurrent chemotherapy</b>          |     |                 |                     |                  |    |                 |                     |                  |
| <b>ICB monotherapy</b>                  | 84  |                 |                     |                  | 84 |                 |                     |                  |
| Non-Responder                           |     | —               | —                   |                  |    | —               | —                   |                  |
| Responder                               |     | 0.30            | 0.16, 0.55          | <b>&lt;0.001</b> |    | 0.39            | 0.22, 0.69          | <b>0.001</b>     |
| Flare-Responder                         |     | 0.22            | 0.10, 0.45          | <b>&lt;0.001</b> |    | 0.31            | 0.16, 0.60          | <b>&lt;0.001</b> |
| <b>concurrent chemotherapy</b>          | 23  |                 |                     |                  | 23 |                 |                     |                  |
| Non-Responder                           |     | —               | —                   |                  |    | —               | —                   |                  |
| Responder                               |     | 1.09            | 0.24, 4.89          | >0.9             |    | 0.56            | 0.19, 1.61          | 0.3              |
| Flare-Responder                         |     | 0.51            | 0.09, 3.07          | 0.5              |    | 0.39            | 0.11, 1.37          | 0.14             |
| <b>line of therapy</b>                  |     |                 |                     |                  |    |                 |                     |                  |
| <b>first line</b>                       | 42  |                 |                     |                  | 42 |                 |                     |                  |
| Non-Responder                           |     | —               | —                   |                  |    | —               | —                   |                  |
| Responder                               |     | 0.45            | 0.17, 1.24          | 0.12             |    | 0.32            | 0.14, 0.73          | <b>0.007</b>     |
| Flare-Responder                         |     | 0.11            | 0.02, 0.53          | <b>0.006</b>     |    | 0.13            | 0.04, 0.42          | <b>&lt;0.001</b> |
| <b>higher lines</b>                     | 65  |                 |                     |                  | 65 |                 |                     |                  |
| Non-Responder                           |     | —               | —                   |                  |    | —               | —                   |                  |
| Responder                               |     | 0.34            | 0.17, 0.67          | <b>0.002</b>     |    | 0.49            | 0.26, 0.92          | <b>0.028</b>     |
| Flare-Responder                         |     | 0.34            | 0.16, 0.72          | <b>0.005</b>     |    | 0.47            | 0.24, 0.93          | <b>0.031</b>     |
| <b>concurrent steroid medication</b>    |     |                 |                     |                  |    |                 |                     |                  |
| <b>no concurrent steroid medication</b> | 90  |                 |                     |                  | 90 |                 |                     |                  |
| Non-Responder                           |     | —               | —                   |                  |    | —               | —                   |                  |
| Responder                               |     | 0.32            | 0.17, 0.61          | <b>&lt;0.001</b> |    | 0.39            | 0.23, 0.68          | <b>&lt;0.001</b> |
| Flare-Responder                         |     | 0.20            | 0.09, 0.44          | <b>&lt;0.001</b> |    | 0.30            | 0.16, 0.57          | <b>&lt;0.001</b> |
| <b>concurrent steroid medication</b>    | 17  |                 |                     |                  | 17 |                 |                     |                  |
| Non-Responder                           |     | —               | —                   |                  |    | —               | —                   |                  |
| Responder                               |     | 0.89            | 0.24, 3.34          | 0.9              |    | 0.76            | 0.23, 2.53          | 0.7              |
| Flare-Responder                         |     | 0.48            | 0.12, 2.04          | 0.3              |    | 0.36            | 0.09, 1.46          | 0.2              |

<sup>1</sup> HR = Hazard Ratio, CI = Confidence Interval
