# Supplementary material for: C reactive protein flare predicts response to checkpoint inhibitor treatment in non-small cell lung cancer
Source: PubMed Central journal article supplement — J Immunother Cancer. 2022 Mar 15;10(3):e004024. doi: 10.1136/jitc-2021-004024 (PMC8928397; doi:10.1136/jitc-2021-004024), 2022-03-15
Supplement: jitc-2021-004024supp006.pdf [file jitc-2021-004024supp006.pdf]

Supplemental table 4  
Cox regression in subgroups  
discovery cohort

| Characteristic                          | PFS |                 |                     |                  | OS |                 |                     |                  |
|-----------------------------------------|-----|-----------------|---------------------|------------------|----|-----------------|---------------------|------------------|
|                                         | N   | HR <sup>1</sup> | 95% CI <sup>1</sup> | p-value          | N  | HR <sup>1</sup> | 95% CI <sup>1</sup> | p-value          |
| <b>concurrent chemotherapy</b>          |     |                 |                     |                  |    |                 |                     |                  |
| <b>ICB monotherapy</b>                  | 47  |                 |                     |                  | 47 |                 |                     |                  |
| Non-Responder                           |     | —               | —                   |                  |    | —               | —                   |                  |
| Responder                               |     | 0.22            | 0.10, 0.48          | <b>&lt;0.001</b> |    | 0.24            | 0.11, 0.52          | <b>&lt;0.001</b> |
| Flare-Responder                         |     | 0.26            | 0.09, 0.74          | <b>0.011</b>     |    | 0.28            | 0.10, 0.76          | <b>0.013</b>     |
| <b>concurrent chemotherapy</b>          | 55  |                 |                     |                  | 55 |                 |                     |                  |
| Non-Responder                           |     | —               | —                   |                  |    | —               | —                   |                  |
| Responder                               |     | 0.70            | 0.26, 1.90          | 0.5              |    | 0.52            | 0.22, 1.25          | 0.14             |
| Flare-Responder                         |     | 0.95            | 0.35, 2.57          | >0.9             |    | 0.73            | 0.31, 1.73          | 0.5              |
| <b>line of therapy</b>                  |     |                 |                     |                  |    |                 |                     |                  |
| <b>first line</b>                       | 70  |                 |                     |                  | 69 |                 |                     |                  |
| Non-Responder                           |     | —               | —                   |                  |    | —               | —                   |                  |
| Responder                               |     | 0.44            | 0.20, 0.97          | <b>0.041</b>     |    | 0.50            | 0.24, 1.00          | 0.052            |
| Flare-Responder                         |     | 0.38            | 0.15, 0.96          | <b>0.040</b>     |    | 0.42            | 0.18, 0.98          | <b>0.045</b>     |
| <b>higher lines</b>                     | 34  |                 |                     |                  | 33 |                 |                     |                  |
| Non-Responder                           |     | —               | —                   |                  |    | —               | —                   |                  |
| Responder                               |     | 0.11            | 0.03, 0.43          | <b>0.002</b>     |    | 0.17            | 0.05, 0.63          | <b>0.008</b>     |
| Flare-Responder                         |     | 0.40            | 0.15, 1.12          | 0.080            |    | 0.58            | 0.23, 1.45          | 0.2              |
| <b>concurrent steroid medication</b>    |     |                 |                     |                  |    |                 |                     |                  |
| <b>no concurrent steroid medication</b> | 76  |                 |                     |                  | 76 |                 |                     |                  |
| Non-Responder                           |     | —               | —                   |                  |    | —               | —                   |                  |
| Responder                               |     | 0.28            | 0.14, 0.55          | <b>&lt;0.001</b> |    | 0.32            | 0.17, 0.61          | <b>&lt;0.001</b> |
| Flare-Responder                         |     | 0.26            | 0.12, 0.60          | <b>0.001</b>     |    | 0.31            | 0.14, 0.66          | <b>0.002</b>     |
| <b>concurrent steroid medication</b>    | 26  |                 |                     |                  | 26 |                 |                     |                  |
| Non-Responder                           |     | —               | —                   |                  |    | —               | —                   |                  |
| Responder                               |     | 0.49            | 0.12, 1.95          | 0.3              |    | 0.36            | 0.10, 1.39          | 0.14             |
| Flare-Responder                         |     | 2.12            | 0.66, 6.81          | 0.2              |    | 1.36            | 0.48, 3.85          | 0.6              |

<sup>1</sup> HR = Hazard Ratio, CI = Confidence Interval
